# Supplementary material for: Thermal vacuum de-oxygen fabrication of new catalytic pigments: SiO2@TiO2−x amorphous photonic crystals for formaldehyde removal
Source: Royal Society of Chemistry journal article supplement (doi:10.1039/d2tb02209e), 2023-01-01
Supplement: d2tb02209e1.pdf [file d2tb02209e1.pdf]

## **Supplementary material:**

### **Thermal vacuum de-oxygen fabrication of a new building pigment:**

### **SiO<sub>2</sub>@TiO<sub>2-x</sub> amorphous photonic crystals for formaldehyde removals**

*Li Feng<sup>a</sup>, Fen Wang<sup>a</sup>, Hongjie Luo<sup>b\*</sup>, Ze Xu<sup>a</sup>, Ting Zhao<sup>a</sup>, Jianfeng Zhu<sup>a</sup>, Yi Qin<sup>a\*</sup>*

<sup>a</sup> School of Materials Science and Engineering, Shaanxi Key Laboratory of Green Preparation and Functionalization for Inorganic Materials, Shaanxi University of Science and Technology, Xian, Shaanxi 710021, China

<sup>b</sup> School of Materials Science and Engineering, Shanghai University, Shanghai 200444, People's Republic of China

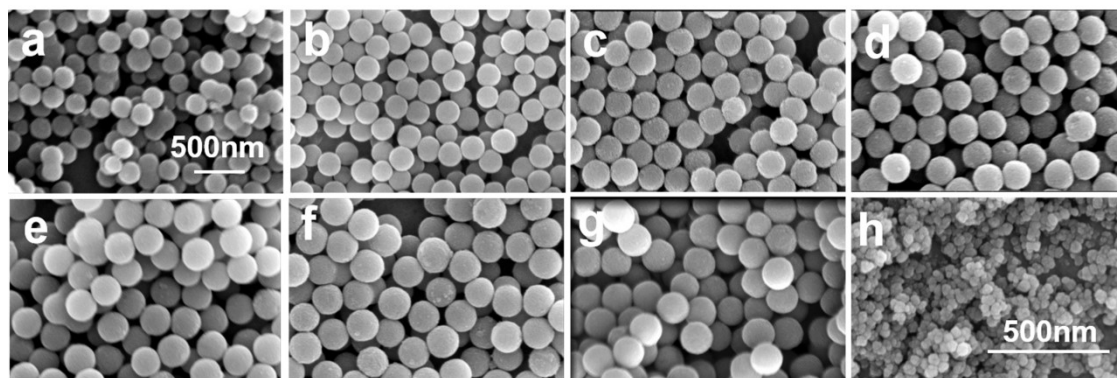

**Fig. S1** SEM of images of  $\text{SiO}_2@\text{TiO}_2$  different diameters: (a) 187 nm, (b) 204 nm, (c) 216 nm, (d) 237 nm, (e) 254 nm, (f) 276 nm and (g) 298 nm. (h) 25nm black  $\text{TiO}_2$  nanoparticles.

**Table S1** Z-fit equivalent circuit data of samples.

| Sample                             | $R_s(\Omega)$ | $Q(\times 10^{-5} \text{Ssec}^n)$ | n      | $R_t(\Omega)$ |
|------------------------------------|---------------|-----------------------------------|--------|---------------|
| $\text{SiO}_2@\text{TiO}_2$        | 21.77         | 1.399                             | 0.8566 | 850.7         |
| 1- $\text{SiO}_2@\text{TiO}_{2-x}$ | 17.26         | 1.615                             | 0.8694 | 384.81        |
| 2- $\text{SiO}_2@\text{TiO}_{2-x}$ | 17.18         | 1.823                             | 0.8528 | 307.9         |
| 3- $\text{SiO}_2@\text{TiO}_{2-x}$ | 14.74         | 2.516                             | 0.8331 | 62.21         |

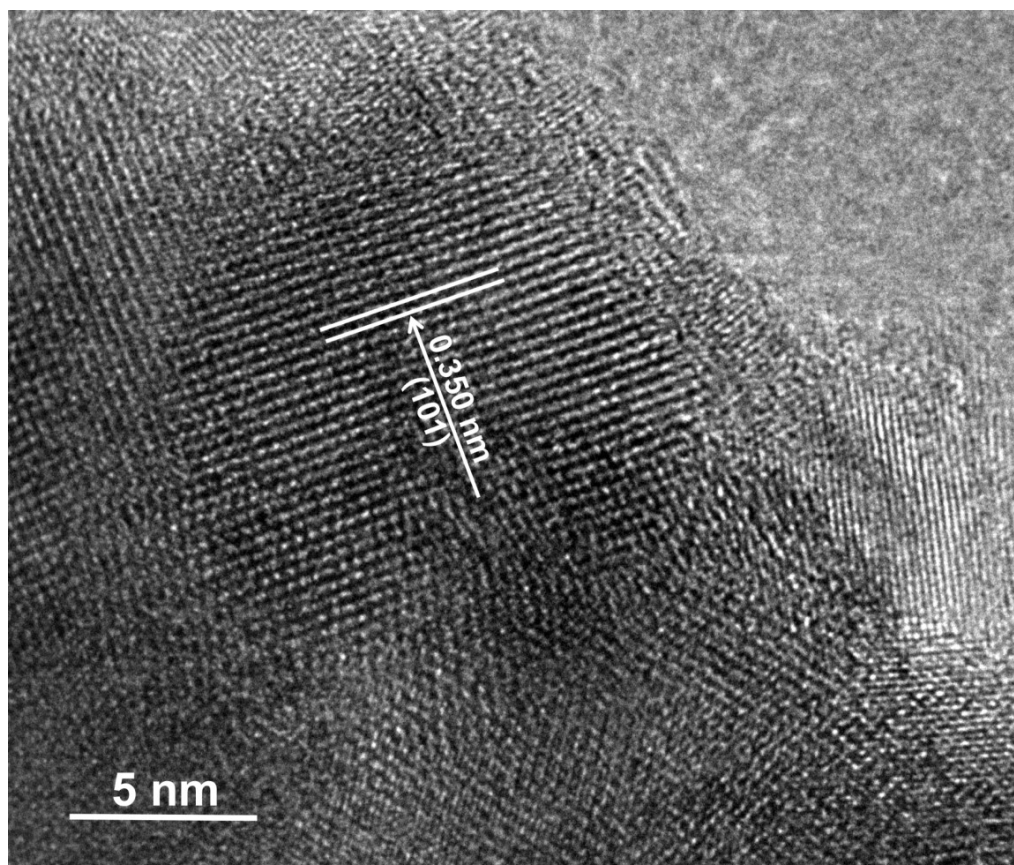

**Fig. S2**  $\text{SiO}_2@\text{TiO}_2$  nanospheres after calcination at 550 °C for 2 h in air.

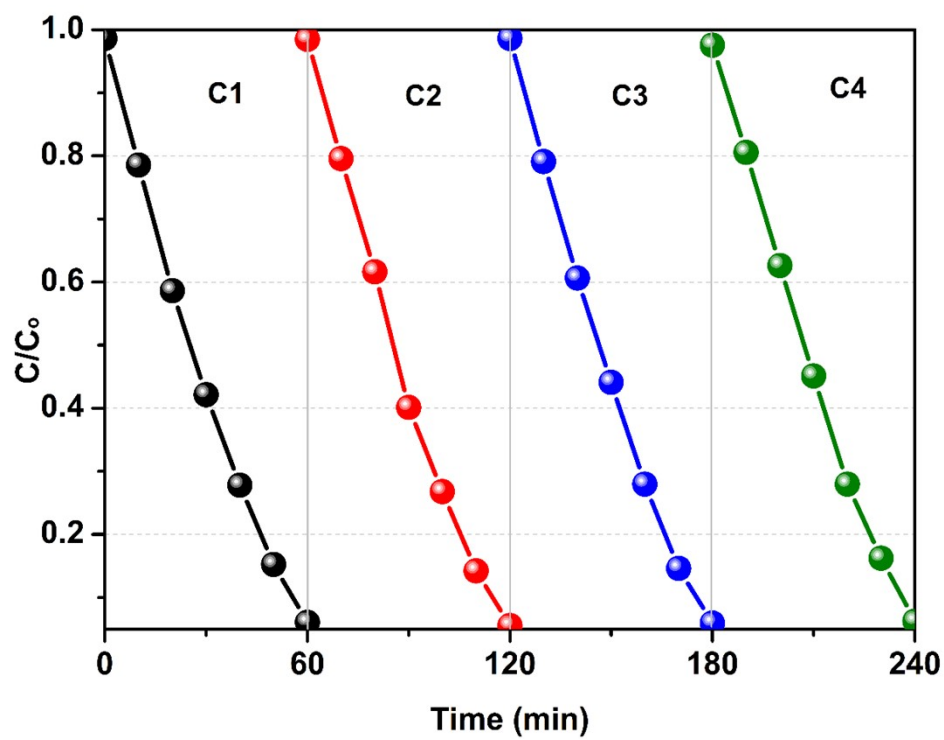

**Fig. S3** photodegradation of RhB by recovered 2- $\text{SiO}_2@\text{TiO}_{2-x}$  showed recyclability in

the repeated photocatalytic cycle.

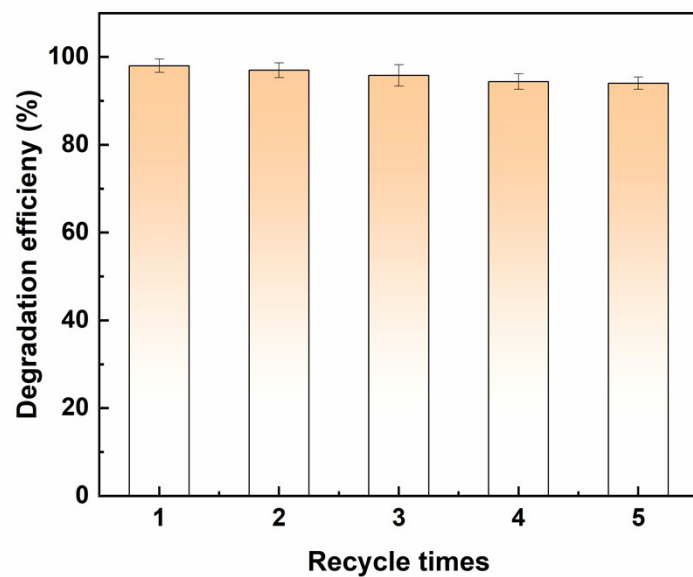

**Fig. S4.** Cycling tests for 2-SiO<sub>2</sub>@TiO<sub>2-x</sub> amorphous photonic crystals, at conditions as: 200 mg of catalysts, 120 min irradiation.

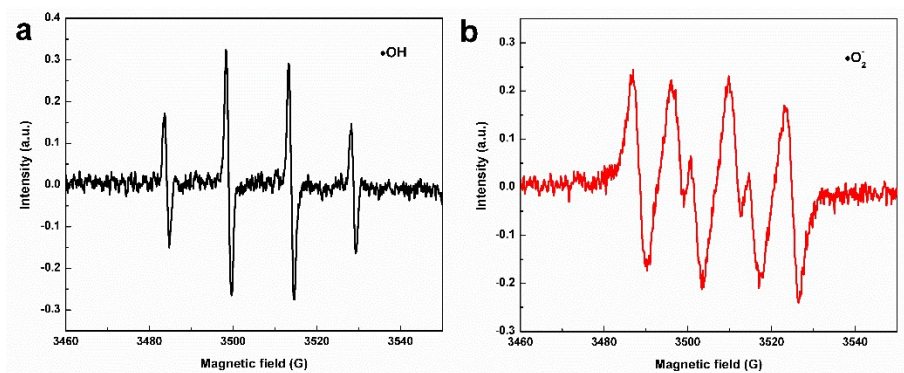

**Fig. S5.** ESR spectra from 2-SiO<sub>2</sub>@TiO<sub>2-x</sub> amorphous photonic crystals showing hydroxyl radical (•HO) and superoxide (•O<sub>2</sub><sup>-</sup>) generation
